# Supplementary material
Source: MDPI journal article supplement (https://www.mdpi.com/2071-1050/14/9/5374)
Supplement: s1 [file s1 › sustainability-1659007-supplementary.pdf]

## Supplementary S1

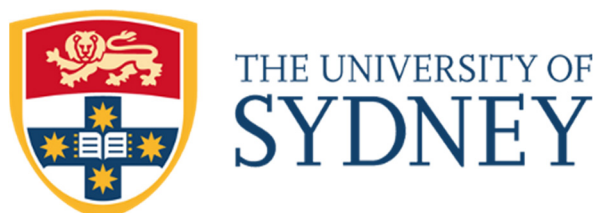

### Using a One Health framework to promote food and nutrition security in United Arab Emirates (Dubai)

Date: / /

#### FORMAT 1 A

#### Food Safety Department Key Informant Question List

##### Food Safety Department Manager:

1. What are the responsibilities of the Food safety Department in the Dubai Municipality?
2. Is there any Food Security committee? What is the governmental plans for food security?
3. How Dubai Municipality deal with the junk food? any law to control it? Any restriction on the advertisements?
4. What is your recommendation to support the food security in the UAE?

##### Food Trade Control Section:

(duty of this section is: control of imported and exported food)

1. May we have access to statistical reports for the last 3 years in relation to food importation (category/sub category, quantity, weight, fresh, frozen, countries)?
2. Do you have an estimate of the amount of food wasted on a daily basis? Do the municipality have plans to reduce the food waste? If so, could you share them with us?
3. How much food is imported into UAE/Dubai that is destined for re-export?
4. What is the percentage of food that is imported for the local market and for re-export?

##### Permits and Applied Nutrition Section:

(duty of this section: awareness program, nutrition, permitting new shops to open)

1. Are there any laws relating to Food Security / Nutritional content of food?
2. What is the role of the Nutrition Unit in the Dubai Municipality?
3. What is the Emirates Food Bank?
4. What are the awareness programs that the Dubai Municipality has for (students, labor campus, public,..) ?

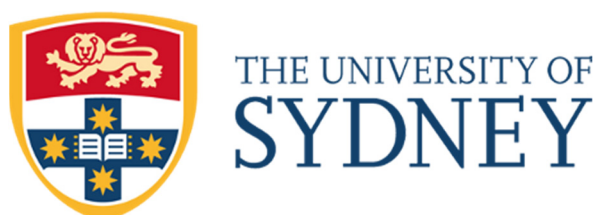

## Using a One Health framework to promote food and nutrition security in United Arab Emirates (Dubai)

Date: //

### FORMAT 2

#### Veterinary Services Section Key Informant Question List

|   | Question                                     | Answer       |     |       |
|---|----------------------------------------------|--------------|-----|-------|
|   |                                              | Species      | UAE | Dubai |
| 1 | How many commercial Farms in UAE / Dubai     | Poultry      |     |       |
|   |                                              | Sheep & Goat |     |       |
|   |                                              | Cattles      |     |       |
|   |                                              | Camels       |     |       |
| 2 | How many Small Farm Producers in UAE / Dubai | Poultry      |     |       |
|   |                                              | Sheep & Goat |     |       |
|   |                                              | Cattles      |     |       |
|   |                                              | Camels       |     |       |
| 3 | How many slaughter houses are in UAE / Dubai | Poultry      |     |       |
|   |                                              | Sheep & Goat |     |       |
|   |                                              | Cattles      |     |       |
|   |                                              | Camels       |     |       |

4-What is the responsibility of the Veterinary Section in Dubai Municipality?

5-How much is the total contribution of the local products in the market?

6-What are the main challenges facing small producers?

7-What is the contribution of small producers to the local market?

8-How many live animals are imported to UAE/Dubai per year?

#### Dubai

|   | Animal | 2015 | 2016 | 2017 |
|---|--------|------|------|------|
| 1 | Cattel |      |      |      |
| 2 | Camel  |      |      |      |
| 3 | Sheep  |      |      |      |
| 4 | Goat   |      |      |      |

#### UAE:

|   | Animal | 2015 | 2016 | 2017 |
|---|--------|------|------|------|
| 1 | Cattel |      |      |      |
| 2 | Camel  |      |      |      |
| 3 | Sheep  |      |      |      |

|   |      |  |  |  |
|---|------|--|--|--|
| 4 | Goat |  |  |  |
|---|------|--|--|--|

9-How many live animals are slaughtered per year in UAE/Dubai?

Dubai:

|   | Animal | 2015 | 2016 | 2017 |
|---|--------|------|------|------|
| 1 | Cattel |      |      |      |
| 2 | Camel  |      |      |      |
| 3 | Sheep  |      |      |      |
| 4 | Goat   |      |      |      |

UAE:

|   | Animal | 2015 | 2016 | 2017 |
|---|--------|------|------|------|
| 1 | Cattel |      |      |      |
| 2 | Camel  |      |      |      |
| 3 | Sheep  |      |      |      |
| 4 | Goat   |      |      |      |

10-Does the government subsidies small farmer producers? If yes, how?

11-How would you define food security for the UAE/Dubai?

12-Is there any plan for ensuring food security in the UAE? If yes, what is it?

13-What is your recommendation to support food security in the UAE?

11-What is your recommendation to support food security in the UAE?

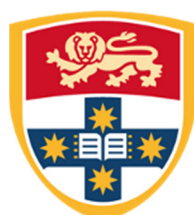

THE UNIVERSITY OF  
SYDNEY

**Using a One Health framework to promote food and nutrition security in United Arab Emirates (Dubai)**

Date: //

### FORMAT 3

#### Small Farms Key Informant Question List

1. Can you estimate the contribution of your company to the local market?
2. What is the daily production?
3. What type of products are produced? And how many different types of each product?
4. What are the main challenges that face the small producers to meet market demand?
5. What do you do with animals after the end of the production cycle?
6. Does the government subsidies the small farmer producers? If yes, how?
7. How would you define food security for the UAE/Dubai?

8. Are you apart of food security plan for the UAE/ Dubai? If yes, how?
9. What is your recommendation to support the food security in the UAE?

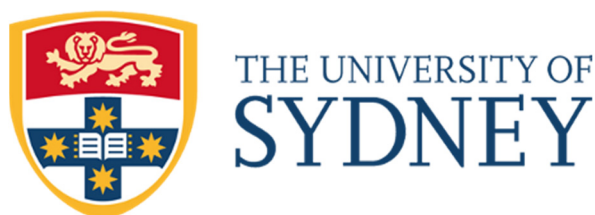

**Using a One Health framework to promote food and nutrition security in United Arab Emirates (Dubai)**

Date: //

#### FORMAT 4

##### Commercial Farms Key Informant Question List

- 1- How much is the company's market share in Dubai/UAE?
- 2- What types of products are produced?
- 3- How much is the daily production of each type?
- 4- What are the main challenges facing the company in order to meet market demand?
- 5- Do you export your products out of UAE/ GCC? If yes, which ones?
- 6- What do you do with animals at the end of the production cycle?
- 7- Does the government subsidise farmer products? If yes, how?
- 8- How would you define food security for the UAE/Dubai?
- 9- Are you involved with the drafting of the food security plan for the UAE/ Dubai? If yes, how?

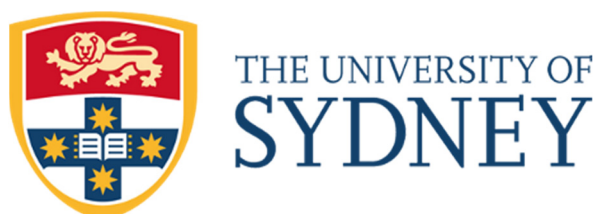

**Using a One Health framework to promote food and nutrition security in United Arab Emirates (Dubai)**

Date: //

#### FORMAT 5

### **Food Suppliers Key Informant Question List**

- 10- What is the company's market share in Dubai/UAE?
- 11- What type of food and how much of each category does your company import on a daily basis?
- 12- How many branches do you have in UAE / Dubai?
- 13- What categories of products are sold? And how many types?
- 14- What are the main challenges that face the company to overcome market demand?
- 15- Do you export your products out of UAE/ GCC?
- 16- Does the government support the companies generally?? If yes, how?
- 17- How would you define food security for the UAE/Dubai?
- 18- Are you a part of food security plan for the UAE/ Dubai? If yes, how?
- 19- How do you deal with food waste? (expired food, not according to the standards , physically damage, ...)?
- 20- From your point of view, are there some companies controlling market demand? If yes, how?
- 21- What are your recommendations to support food security in the UAE?

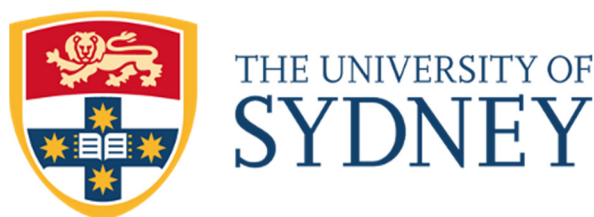

**Using a One Health framework to promote food and nutrition security in United Arab Emirates (Dubai)**

Date: //

### **FORMAT 6**

### **Focus Group Key Informant Question List**

22. How would you define food and nutrition security for the UAE/Dubai?
23. What is the major challenges that face the food and nutrition security in UAE /Dubai?
24. How can we overcome the challenges that face the food and nutrition security in UAE / Dubai?
25. What is the level of the awareness within the population about the nutritional value of the food?
26. How are/can local producers can be a part of the food and nutrition security of UAE/ Dubai?

27. Are neighboring countries facing the same challenges?
28. How can the private sector participate in the food and nutrition security of UAE / Dubai?
29. How can waste food be used?
30. What are your recommendations in support of food security in the UAE?
31. Are there any studies that focus on the labour force and their nutritional status?
32. Can GMO food / Meat in vivo be a part of the solution for the future?

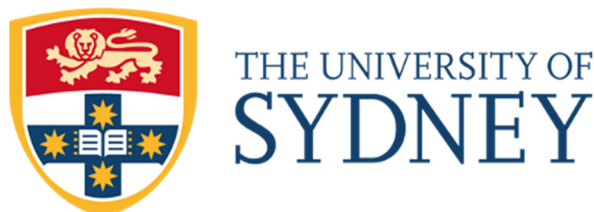

**Using a One Health framework to promote food and nutrition security in United Arab Emirates (Dubai)**

Date: / /

#### FORMAT 7

##### *Animal Feed Retailers Key Informant Question List*

- 33 Can you estimate the contribution of your company to the local market?
- 34 What is the daily sale?
- 35 What type of products you sale? And how many different types of each product ?
- 36 What are the main challenges that face the small producers to meet market demand?
- 37 How would you define food security for the UAE/Dubai?
- 38 Are you apart of food security plan for the UAE/ Dubai? If yes, how?
- 39 What is your recommendation to support the food security in the UAE?

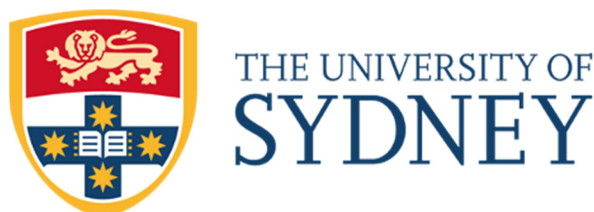

**Using a One Health framework to promote food and nutrition security in United Arab Emirates (Dubai)**

Date: / /

## FORMAT 8

### Commercial Animal Feed Companies Key Informant Question List

- 40 What types of products are produced?
- 41 How much is the daily production of each type?
- 42 What are the main challenges facing the company in order to meet market demand?
- 43 Do you export your products out of UAE/ GCC? If yes, which ones?
- 44 Does the government subsidise the products? If yes, how?
- 45 How would you define food security for the UAE/Dubai?
- 46 Are you involved with the drafting of the food security plan for the UAE/ Dubai? If yes, how?

### Supplementary S2

#### Participant Consent Form - General

- This is a **general** participant consent form template designed to suit most studies. There are also a series of templates for specific types of research (e.g. oral history, ethnography) on our website. Feel free to choose the one that best suits your project.
- This document references the **National Statement on Ethical Conduct in Human Research** (NHMRC, 2007), referred to as “the National Statement” in brief. It is essential reading when planning and conducting your study.
- **This template is a guide only and you should adapt it to your project.** You must include all the numbered sections, but within each section there are paragraphs that are mandatory and others that are only relevant to specific types of studies. You may need to decide whether a certain paragraph should be included, or choose between alternative wording options. You should **delete** any paragraphs that are not relevant to your study and remove all prompts and instructions from your final document.
- In this template:
  - The *red italics* are instructions outlining the general nature of the information you need to provide.
  - The black text provides standard phrases for you to use.
  - The *blue italics* are prompts for required/suggested content. All sections are mandatory, unless marked with “*if applicable to your study*”.
- Try to write concisely; long forms can be difficult to read and understand.
- The documents should be written in **lay language** that is readily understandable for participants. Avoid jargon and technical language. Write to, not about, the participant (i.e. “you will be asked to...” NOT “participants will be asked to”).
- **Please proofread documents for spelling, grammatical and formatting errors, clarity and comprehensibility.**
- Include the document **version number and date** in the footer of each page, and update them each time revisions are made. If more than one Participant Information Statement/Consent Form is required for your project (e.g. for separate participant groups or a pilot/sub-study), please label the different forms clearly.
- **Participants must be provided with a copy of the Participant Information Statement and signed Consent Form, and you must retain a copy for your study records.**
- In some cultural contexts/with certain participants **oral consent** may be more appropriate than written consent (as per section 2.2.5 of the National Statement). If this is the case, you should use the Participant Information Statement/Consent Form templates as a guide to create an oral consent script. In your ethics application, you should explain why oral consent is appropriate and how consent will be recorded (e.g. using an audio recording, written in field notes etc). See our [website](#) for more information.

- If Participant Information Statements/Consent Forms in languages other than English are to be used, you need to supply these to the HREC once you have final versions in English that are approved by the HREC. The **translations** must be certified by a person who has no conflict of interest and is not associated with the research project. A signed and witnessed Statutory Declaration is sufficient if the person is not an official translator or a university staff member with appropriate expertise. See our [website](#) for more information.

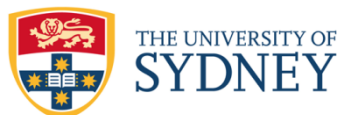

ABN 15 211 513 464

School of Veterinary, Faculty of Science

**CHIEF INVESTIGATOR (SUPERVISOR)****NAME***Roby Alders*

Sydney School of Veterinary Science, School  
of Life and Environmental Sciences and  
Charles Perkins Centre, University of Sydney

Tel: +61-2-8627-1771;

Mobile: +61-467-603370

Web: <http://www.sydney.edu.au/>

Room D17

Charles Perkins Centre

The University of Sydney

NSW 2006 AUSTRALIA

Telephone: +61-414412282

Email: [salh2790@sydney.edu.au](mailto:salh2790@sydney.edu.au)Web: <http://www.sydney.edu.au/>**Using a One Health framework to promote food and nutrition security in United Arab Emirates (Dubai)****PARTICIPANT CONSENT FORM**

I, ..... [PRINT NAME], agree to take part in this research study.

In giving my consent I state that:

- I understand the purpose of the study, what I will be asked to do, and any risks/benefits involved.
- I have read the Participant Information Statement and have been able to discuss my involvement in the study with the researchers if I wished to do so.
- The researchers have answered any questions that I had about the study and I am happy with the answers.
- I understand that being in this study is completely voluntary and I do not have to take part. My decision whether to be in the study will not affect my relationship with the researchers or anyone else at the University of Sydney now or in the future.
- I understand that I can withdraw from the study at any time.

- I understand that I may stop the interview at any time if I do not wish to continue, and that unless I indicate otherwise any recordings will then be erased and the information provided will not be included in the study. I also understand that I may refuse to answer any questions I don't wish to answer.
- I understand that I may leave the focus group at any time if I do not wish to continue. I also understand that it will not be possible to withdraw my comments once the group has started as it is a group discussion.
- I understand that my questionnaire responses cannot be withdrawn once they are submitted, as they are anonymous and therefore the researchers will not be able to tell which one is mine.
- I understand that personal information about me that is collected over the course of this project will be stored securely and will only be used for purposes that I have agreed to. I understand that information about me will only be told to others with my permission, except as required by law.
- I understand that the results of this study may be published, but these publications will not contain my name or any identifiable information about me.

I consent to:

- **Audio-recording**

YES ☐ NO ☐

- **Video-recording**

YES ☐ NO ☐

- **Photographs**

YES ☐ NO ☐

- **Being contacted about future studies**

YES ☐ NO ☐

**I would like to review my interview transcripts**

YES ☐ NO ☐

**I would like to receive feedback about the overall results of this study**

YES ☐ ☐

If you answered **YES**, please indicate your preferred form of feedback and address:

Postal: \_\_\_\_\_

\_\_\_\_\_

Email: \_\_\_\_\_

.....

**Signature**

.....

**PRINT name**

.....

**Date**

## Supplementary S3

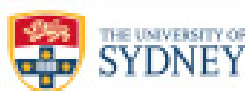

**Research Integrity & Ethics Administration**  
Human Research Ethics Committee

Thursday, 22 March 2018

Assoc Prof Robyn Alders  
Veterinary Science; Faculty of Science  
Email: [robyn.alders@sydney.edu.au](mailto:robyn.alders@sydney.edu.au)

Dear Robyn,

The University of Sydney Human Research Ethics Committee (HREC) has considered your application.

After consideration of your response to the comments raised your project has been approved.

Approval is granted for a period of four years from 22/03/2018 to 22/03/2022

**Project title:** Using a One Health framework to promote food and nutrition security in United Arab Emirates (Dubai)

**Project no.:** 2018/033

**First Annual Report due:** 22/03/2019

**Authorised Personnel:** Alders Robyn; Alhashmi Sayed Essam; Gill Timothy;

**Documents Approved:**

| Date Uploaded | Version number | Document Name                                   |
|---------------|----------------|-------------------------------------------------|
| 04/03/2018    | Version 2      | Revised PIS                                     |
| 04/03/2018    | Version 3      | Student safety protocol                         |
| 04/03/2018    | Version 1      | Recruitment information - phone                 |
| 04/03/2018    | Version 2      | Question list                                   |
| 15/01/2018    | Version 1      | Letter of invitation to be send via email       |
| 14/01/2018    | Version 1      | consent                                         |
| 13/11/2017    | Version 1      | Commercial producer key informant question list |
| 11/11/2017    | Version 1      | vet. format                                     |
| 11/11/2017    | Version 1      | Food Safety                                     |
| 11/11/2017    | Version 1      | Small Farm                                      |
| 11/11/2017    | Version 1      | Focus Group                                     |

**Conditions of Approval**

- Research must be conducted according to the approved proposal.
- An annual progress report must be submitted to the Ethics Office on or before the anniversary of approval and on completion of the project.
- You must report as soon as practicable anything that might warrant review of ethical approval of the project including:
  - Serious or unexpected adverse events (which should be reported within 72 hours).
  - Unforeseen events that might affect continued ethical acceptability of the project.
- Any changes to the proposal must be approved prior to their implementation (except where an amendment is undertaken to eliminate immediate risk to participants).

Research Integrity & Ethics Administration  
Level 2, Margaret Teller Building (K037)  
The University of Sydney  
NSW 2006 Australia

T +61 2 9350 9161  
E [human.ethics@sydney.edu.au](mailto:human.ethics@sydney.edu.au)  
W [sydney.edu.au/ethics](http://sydney.edu.au/ethics)

ABN 16 211 812 646  
CRICOS 00226A

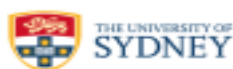

- Personnel working on this project must be sufficiently qualified by education, training and experience for their role, or adequately supervised. Changes to personnel must be reported and approved.
- Personnel must disclose any actual or potential conflicts of interest, including any financial or other interest or affiliation, as relevant to this project.
- Data and primary materials must be retained and stored in accordance with the relevant legislation and University guidelines.
- Ethics approval is dependent upon ongoing compliance of the research with the *National Statement on Ethical Conduct in Human Research*, the *Australian Code for the Responsible Conduct of Research*, applicable legal requirements, and with University policies, procedures and governance requirements.
- The Ethics Office may conduct audits on approved projects.
- The Chief Investigator has ultimate responsibility for the conduct of the research and is responsible for ensuring all others involved will conduct the research in accordance with the above.

This letter constitutes ethical approval only.

Please contact the Ethics Office should you require further information or clarification.

Sincerely,

A handwritten signature in black ink that reads 'Glen Davis' with a large, stylized 'E' below it.

Professor Glen Davis  
Chair, Human Research Ethics Committee (HREC 2)

The University of Sydney HRECs are constituted and operate in accordance with the *National Health and Medical Research Council's (NHMRC) National Statement on Ethical Conduct in Human Research (2007)* and the *NHMRC's Australian Code for the Responsible Conduct of Research (2007)*.

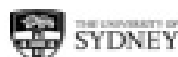

Using a One Health framework to promote food and nutrition security in United Arab Emirates,  
Dubai

Sayed Essam Sharaf Alhashimi

Level 4, Charles Perkins Centre

Faculty of Science

School of Life and Environmental Sciences

University of Sydney

Camperdown, NSW 2006

E: saih2790@uni.sydney.edu.au

M: To be updated

To whom it may concern,

My name is Sayed Essam Sharaf Alhashimi and I am a postgraduate student in the Faculty of Science, at the University of Sydney. Our research team is conducting a study on food and nutrition security in Dubai. The project has approval from the human ethics committee (Approval no. X) at the University of Sydney. My primary supervisor is Professor Robyn Alders and my co-supervisor is Professor Tim Gill and our team is based on Level 4 of the Charles Perkins Centre at the University of Sydney.

Food security is a global priority and despite increases in agricultural production over the past two decades, malnutrition remains a significant global issue. With heavy reliance on imports and limited availability of agricultural resources posing a challenge to the economy, the issue of food security remains critical nation-wide in the United Arab Emirates. This research addresses the latest trends, investment opportunities, growth drivers and challenges impacting various sectors of the local and global food industry.

In addition, it has been reported that the average obesity levels in UAE are twice those of the world average. Obesity resolution is assisted by the availability of high quality nutrition, however in emirates such as Dubai, it can be difficult to easily access nutritional food where the majority of food or food ingredients are being imported. This research seeks to generate recommendations concerning strategic investments in food and food ingredients that promote optimal health and nutrition.

The research objectives are:

- To investigate the food security and nutrition situation in UAE community in both normal and crisis situations at the community and national levels;
- To examine the optimal food-based approaches to achieve basic nutrition and health in UAE; and
- To determine key components required to improve UAE food security through local livestock, agricultural production and sustainable, nutritious food supply systems.

Page 1 of 2

Sayed Essam Sharaf Alhashimi, PhD candidate  
Professor Robyn Alders, AO, Principal Investigator  
Letter of Introduction 2018 v1  
15/01/2018

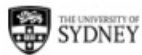

Using a One Health framework to promote food and nutrition security in United Arab Emirates, Dubai

Thank you for your time today in reading this letter. If you would like to participate in the study or have any further questions please contact either Sayed Essam Sharaf Alhashimi or Robyn Alders (details provided below).

Yours sincerely,

Sayed Essam Sharaf Alhashimi

**Contact Details**

Sayed Essam Sharaf Alhashimi

E: [salh2790@uni.sydney.edu.au](mailto:salh2790@uni.sydney.edu.au)

M: To be updated

1. Professor Robyn Alders AO  
E: [robyn.alders@uni.sydney.edu.au](mailto:robyn.alders@uni.sydney.edu.au)  
P: (02) 8627 1771
